# Supplementary material for: Assembly of a unique octa-nuclear copper cluster-based metal–organic framework with highly selective CO2 adsorption over N2 and CH4
Source: Royal Society of Chemistry journal article supplement (doi:10.1039/c3cc47462c), 2013-01-01
Supplement: c3cc47462c.pdf [file c3cc47462c.pdf]

## Electronic Supplementary Information (ESI)

### Assembly of a unique octa-nuclear copper cluster-based metal-organic framework with highly selective CO<sub>2</sub> adsorption over N<sub>2</sub> and CH<sub>4</sub>

Jiahuan Luo, Jing Wang, Guanghua Li, Qisheng Huo and Yunling Liu\*

*State Key Laboratory of Inorganic Synthesis and Preparative Chemistry, College of Chemistry,*

*Jilin University, Changchun 130012, P. R. China. E-mail: [yunling@jlu.edu.cn](mailto:yunling@jlu.edu.cn); Fax:*

*+86-431-85168624; Tel: +86-431-85168614*

#### Materials and Methods

The ligand was prepared according to the literature.<sup>1</sup> All the other reagents were obtained from commercial sources and used without further purification.

Powder X-ray diffraction (PXRD) data were collected on a Rigaku D/max-2550 diffractometer with CuK $\alpha$  radiation ( $\lambda = 1.5418 \text{ \AA}$ ). The elemental analyses were performed on a Perkin-Elmer 2400 element analyzer. The infrared (IR) spectra were recorded within the 4000-400 cm<sup>-1</sup> region on a Nicolet Impact 410 FTIR spectrometer with KBr pellets. Thermogravimetric (TG) analyses were performed on TGA Q500 V20.10 Build 36 thermogravimetric analyzer in the temperature range 35-800 °C under air flow with the heating rate of 10 °C min<sup>-1</sup>. N<sub>2</sub>, CH<sub>4</sub> and CO<sub>2</sub> sorption isotherm measurements of **JLU-Liu1** were carried out on a Micromeritics ASAP 2020 instrument.

#### Single Crystal X-ray Structure Determination

Data were collected on a Bruker Apex II CCD diffractometer at 293(2) K for **JLU-Liu1**, with graphite-monochromated MoK $\alpha$  radiation ( $\lambda = 0.71073 \text{ \AA}$ ). The structure was solved by direct methods and refined by full-matrix least-squares methods with SHELXTL.<sup>2</sup> All non-hydrogen atoms were easily found from the difference Fourier map. All non-hydrogen atoms were refined anisotropically. PLATON/SQUEEZE<sup>3</sup> was employed to calculate the diffraction contribution of the solvent molecules and, thereby, to produce a set of solvent-free diffraction intensities; structures were then refined again using the generated data. Basic information pertaining to crystal parameters and structure refinement is summarized in Table S1.

**Table S1.** Crystal data and structure refinement for compound **JLU-Liu1**.

| Name                                                          | JLU-Liu1                                                                                              |
|---------------------------------------------------------------|-------------------------------------------------------------------------------------------------------|
| Empirical formula                                             | C <sub>15.5</sub> H <sub>24.5</sub> Cu <sub>4</sub> N <sub>3.5</sub> O <sub>19.5</sub> S <sub>3</sub> |
| Formula weight                                                | 922.23                                                                                                |
| Temperature (K)                                               | 293(2)                                                                                                |
| Wave length (Å)                                               | 0.71073                                                                                               |
| Crystal system                                                | Tetragonal                                                                                            |
| Space group                                                   | <i>P4<sub>3</sub>2<sub>1</sub>2</i>                                                                   |
| a (Å)                                                         | 13.6542(9)                                                                                            |
| b (Å)                                                         | 13.6542(9)                                                                                            |
| c (Å)                                                         | 42.160(4)                                                                                             |
| Volume (Å <sup>3</sup> )                                      | 7860.1(10)                                                                                            |
| Z, D <sub>calc</sub> (Mg/m <sup>3</sup> )                     | 8, 1.559                                                                                              |
| Absorption coefficient (mm <sup>-1</sup> )                    | 2.362                                                                                                 |
| F (000)                                                       | 3696                                                                                                  |
| θ range (deg)                                                 | 1.57 to 28.4                                                                                          |
| Limiting indices                                              | -13 ≤ h ≤ 18<br>-17 ≤ k ≤ 18<br>-56 ≤ l ≤ 52                                                          |
| reflections collected/<br>unique (Rint)                       | 49638/9858<br>[R(int)= 0.0494]                                                                        |
| Crystal size (mm <sup>3</sup> )                               | 0.27 × 0.24 × 0.21                                                                                    |
| Data/restraints/parameters                                    | 9802/108/389                                                                                          |
| Goodness-of-fit on <i>F</i> <sup>2</sup>                      | 99.8 %                                                                                                |
| R <sub>1</sub> , wR <sub>2</sub> ( <i>I</i> > 2σ( <i>I</i> )) | 0.0349, 0.0931                                                                                        |
| R <sub>1</sub> , wR <sub>2</sub> (all data)                   | 0.0384, 0.0943                                                                                        |
| largest difference in peak and hole (e Å <sup>-3</sup> )      | 0.907, -0.692                                                                                         |

$$R_1 = \frac{\sum ||F_o| - |F_c||}{\sum |F_o|}, \quad wR_2 = \left[ \frac{\sum [w(F_o^2 - F_c^2)^2]}{\sum [w(F_o^2)^2]} \right]^{1/2}$$

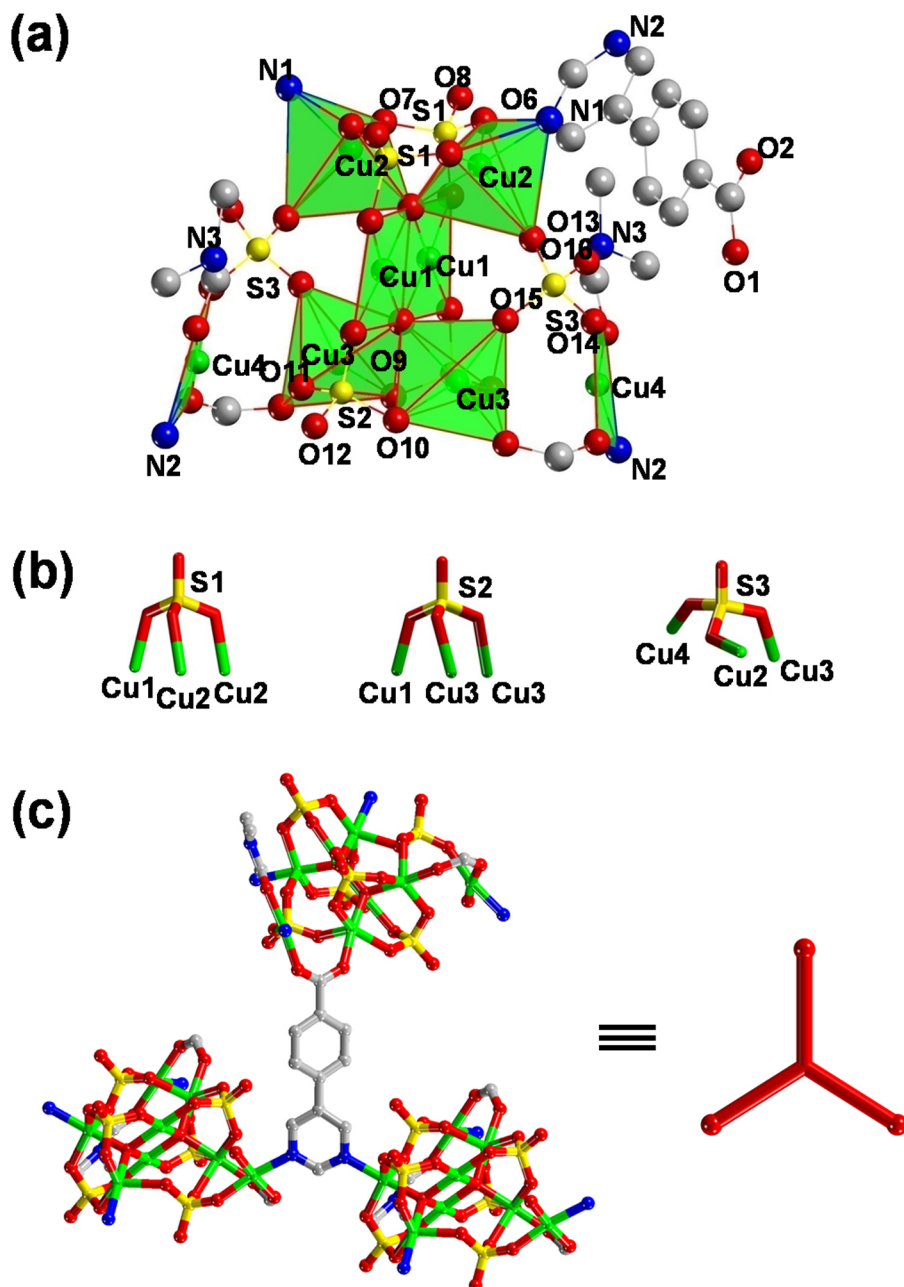

**Figure S1.** Coordination states in the crystal structure of **JLU-Liu1**: (a) coordinated mode of the octa-nuclear copper SBU; (b) coordination modes of the three sulfate ions; (c) the 4-PmBC<sup>-</sup> ligand linked to three octa-nuclear copper SBU, which can be viewed as a 3-connected node. Color scheme: copper: green; carbon: grey; oxygen: red, nitrogen, blue, sulfur yellow. H atoms are omitted for clarity.

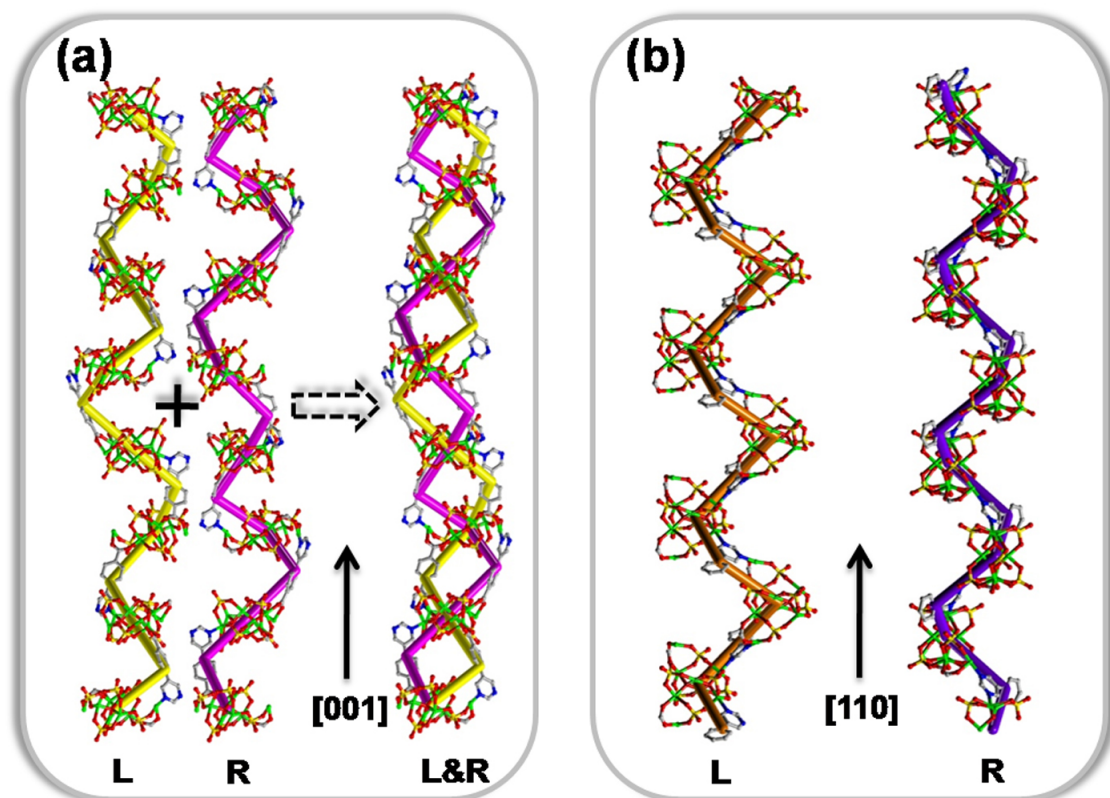

**Figure S2.** The exhibition of the helical chains in the framework of JLU-Liu1: (a) a left-handed (L) and a right-handed (R) helix intersect at the copper clusters to form a double helical chain along [001] direction; (b) a left-handed (L) and a right-handed (R) helix along [110] direction.

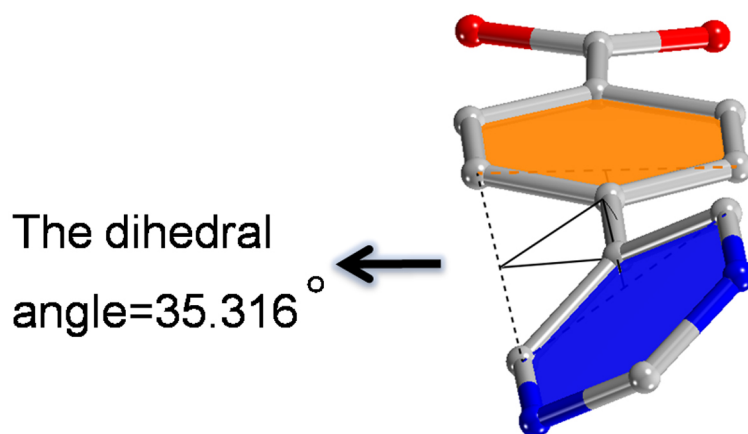

**Figure S3.** The dihedral angle between two aromatic rings.

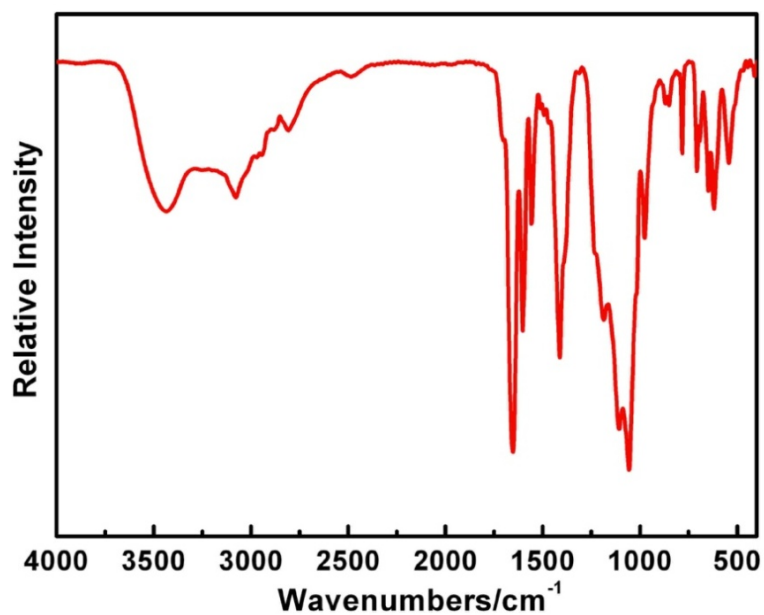

**Figure S4.** Infrared spectra for **JLU-Liu1** (KBr, cm<sup>-1</sup>): 3027br, 2930br, 1661s, 1584s, 1433s, 1311w, 1259w, 1104m, 1059w, 923w, 785m, 729m, 673w, 537w, 451w.

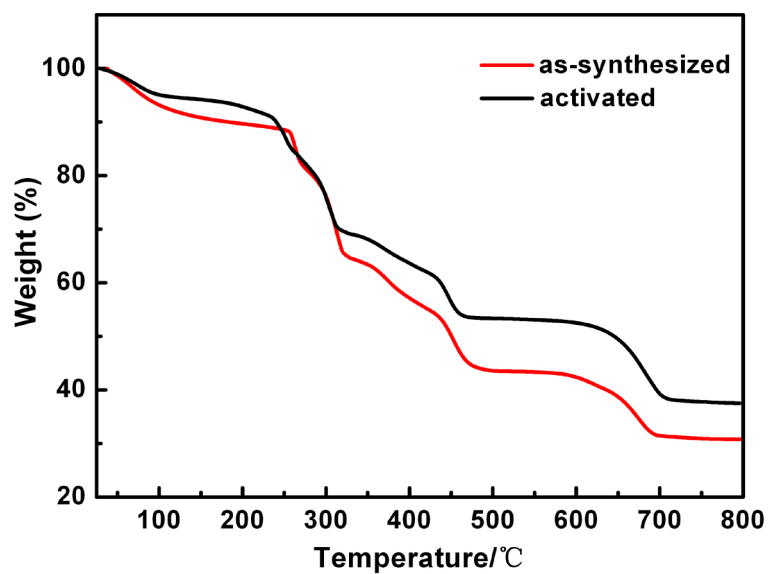

**Figure S5.** The TGA curve of as-synthesized and activated **JLU-Liu1**.

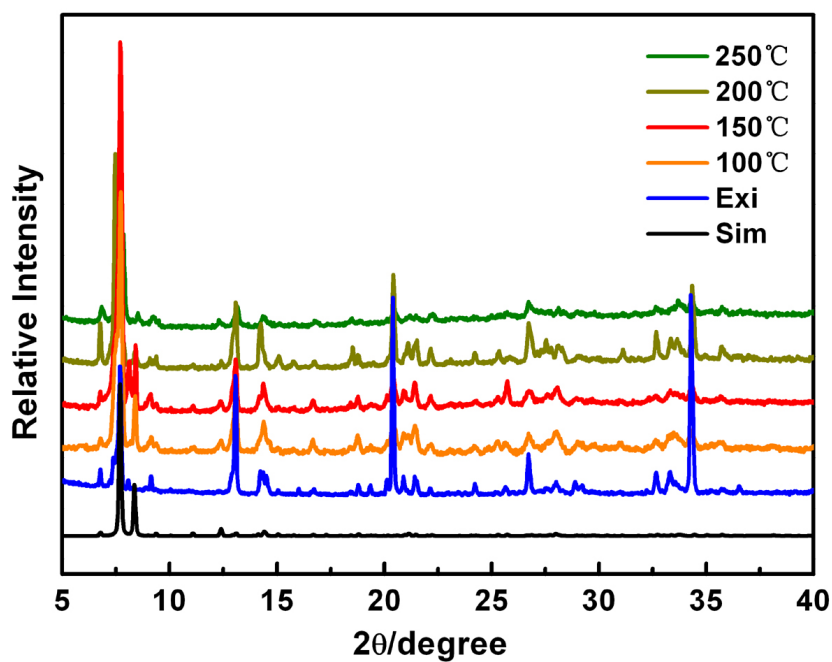

Figure S6. Variable-temperature powder XRD patterns of JLU-Liu1.

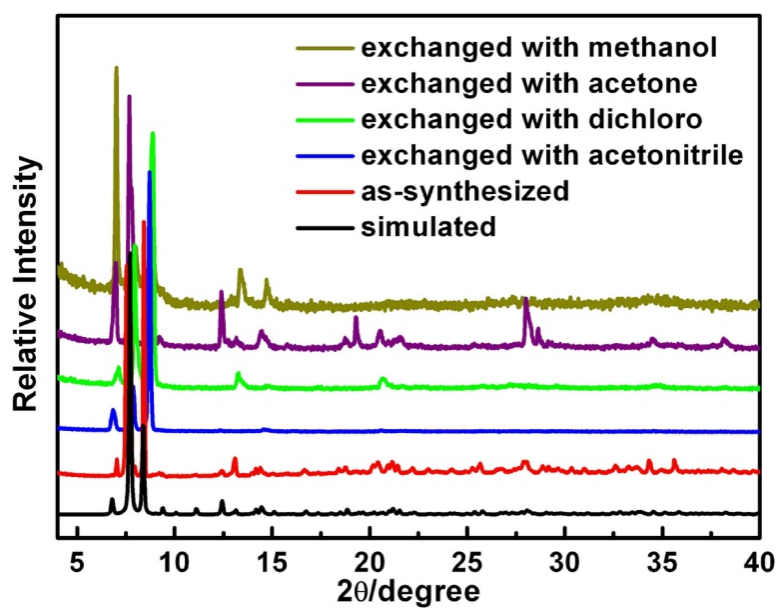

Figure S7. The XRD patterns of JLU-Liu1 after immersed in different solvents.

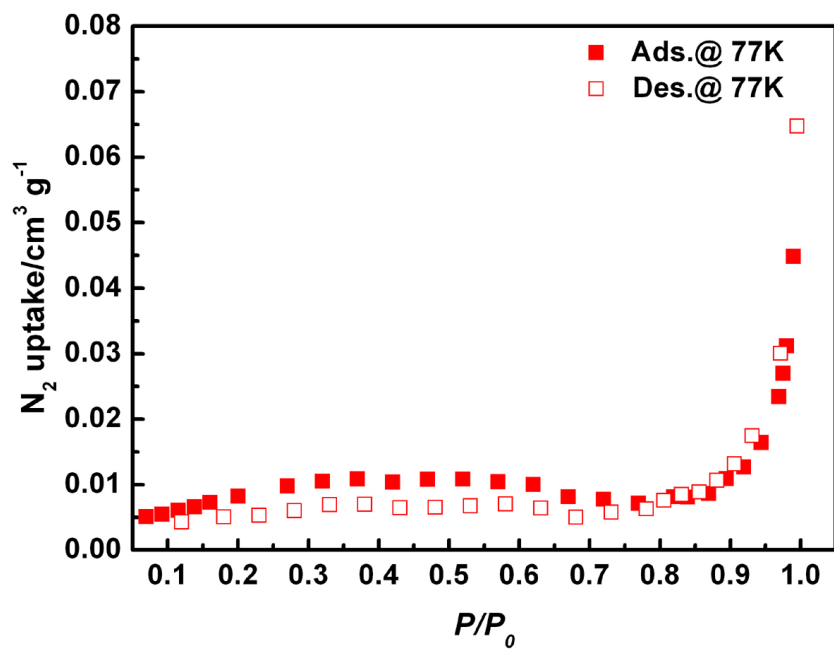

Figure S8. The  $N_2$  sorption isotherm of activated JLU-Liu1 at 77K.

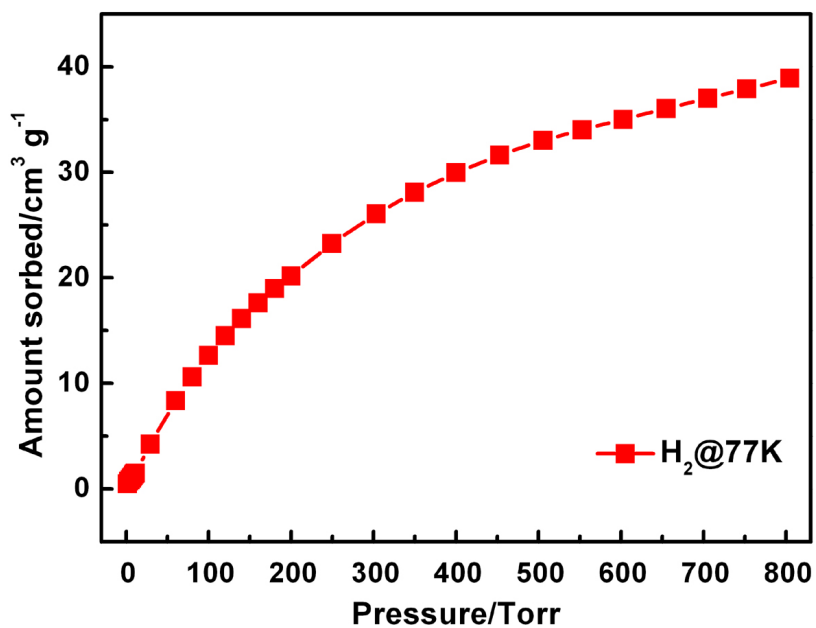

Figure S9. The  $H_2$  sorption isotherm of activated JLU-Liu1 at 77K.

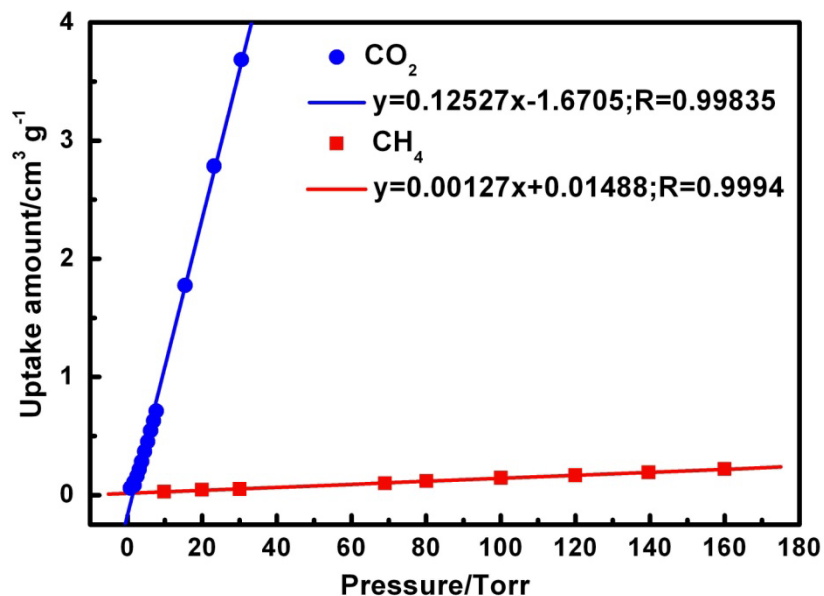

**Figure S10.** Calculation of CO<sub>2</sub>:CH<sub>4</sub> selectivity by initial slope of the gas uptake on JLU-Liu1. (Blue dot and solid line: uptake of CO<sub>2</sub>, red square and line: uptake of CH<sub>4</sub>.)

#### References

1. Y. Gong and H. W. Pauls, *Synlett*. **2000**, 6, 829-831.
2. G. M. Sheldrick, SHELXTL-97, Program for Crystal Structure Refinement, University of Gottingen, 1997
3. A. L. Spek, *J. Appl. Crystallogr.* **2003**, 36, 7.
